# Supplementary material for: The Volatile Flavor Substances, Microbial Diversity, and Their Potential Correlations of Inner and Surface Areas within Chinese Qingcheng Mountain Traditional Bacon
Source: MDPI journal article supplement (doi:10.3390/foods12203729), 2023-10-11
Supplement: s1 [file s1]

Table S1. Volatile flavor substances and content in the inner and surface CQTB.

| No           | Compound name and classification | CAS        | Absolute content (μg/kg ) |                           |
|--------------|----------------------------------|------------|---------------------------|---------------------------|
|              |                                  |            | Inner                     | Surface                   |
| Phenols      |                                  |            |                           |                           |
| A1           | 2,5-Dimethylphenol               | 95-87-4    | -                         | 94.19±11.6 <sup>a</sup>   |
| A2           | 2,6-Dimethoxyphenol              | 91-10-1    | 35.15±3.59 <sup>b</sup>   | 90.95±10.33 <sup>a</sup>  |
| A3           | 2-Methoxy-5-methylphenol         | 1195-09-1  | 120.04±14.46 <sup>b</sup> | 246.63±30.21 <sup>a</sup> |
| A4           | 3,5-Dimethylphenol               | 108-68-9   | 46.19±1.26 <sup>a</sup>   | 48.75±5.36 <sup>a</sup>   |
| A5           | 3-Ethyl-5-methylphenol           | 698-71-5   | -                         | 10.98±1.21 <sup>a</sup>   |
| A6           | 4-Ethyl-2-methoxyphenol          | 2785-89-9  | 62.08±1.60 <sup>b</sup>   | 161.83±20.36 <sup>a</sup> |
| A7           | 4-Ethylphenol                    | 123-07-9   | 13.04±0.54 <sup>b</sup>   | 44.04±5.12 <sup>a</sup>   |
| A8           | 2-Methoxy-4-propylphenol         | 2785-87-7  | 2.46±0.24 <sup>b</sup>    | 26.49±3.12 <sup>a</sup>   |
| A9           | Eugenol                          | 97-53-0    | 2.77±0.24 <sup>b</sup>    | 11.29±1.28 <sup>a</sup>   |
| A10          | Guaiacol                         | 90-05-1    | 161.01±14.57 <sup>b</sup> | 244.33±14.57 <sup>a</sup> |
| A11          | O-cresol                         | 95-48-7    | 110.53±2.89 <sup>b</sup>  | 248.09±28.56 <sup>a</sup> |
| A12          | P-cresol                         | 106-44-5   | 92.06±8.53 <sup>b</sup>   | 310.71±42.51 <sup>a</sup> |
| Aldehydes    |                                  |            |                           |                           |
| B1           | 1-Nonanal                        | 124-19-6   | 168.82±12.25 <sup>b</sup> | 227.73±19.77 <sup>a</sup> |
| B2           | 2-Ethyl-2-hexenal                | 645-62-5   | -                         | 37.94±4.25 <sup>a</sup>   |
| B3           | 6-(Acetoxy)-4-methyl-4-hexenal   | 35334-60-2 | -                         | 42.12±5.36 <sup>a</sup>   |
| B4           | Heptanal                         | 111-71-7   | 40.54±1.53 <sup>a</sup>   | 31.06±4.16 <sup>b</sup>   |
| B5           | N-hexanal                        | 66-25-1    | 184.1±6.01 <sup>a</sup>   | -                         |
| B6           | Phenylacetaldehyde               | 122-78-1   | -                         | 50.96±5.12 <sup>a</sup>   |
| Hydrocarbons |                                  |            |                           |                           |
| C1           | 2-Methylnaphthalene              | 91-57-6    | -                         | 12.64±1.26 <sup>a</sup>   |
| C2           | Acenaphthene                     | 83-32-9    | 3.25±0.39 <sup>b</sup>    | 39.63±5.02 <sup>a</sup>   |
| C3           | Dodecane                         | 112-40-3   | -                         | 22.56±2.26 <sup>a</sup>   |
| C4           | N-hexadecane                     | 2801-87-8  | 1.00±0.17 <sup>a</sup>    | -                         |
| C5           | N-octane                         | 111-65-9   | 15.91±1.39 <sup>b</sup>   | 123.54±18.3 <sup>a</sup>  |

|          |                                      |            |                     |                      |
|----------|--------------------------------------|------------|---------------------|----------------------|
| C6       | $\alpha$ -Cedrene                    | 469-61-4   | $0.82 \pm 0.14^b$   | $32.51 \pm 3.22^a$   |
| Ketones  |                                      |            |                     |                      |
| D1       | 1-(2-Hydroxy-5-methylphenyl)ethanone | 1450-72-2  | $6.19 \pm 0.58^b$   | $19.11 \pm 2.25^a$   |
| D2       | 1-Indanone                           | 83-33-0    | $7.61 \pm 0.72^b$   | $16.5 \pm 1.78^a$    |
| D3       | 2-Nonanone                           | 821-55-6   | -                   | $55.69 \pm 5.65^a$   |
| D4       | Ethyl cyclopentaenol ketone          | 21835-01-8 | $14.88 \pm 1.86^b$  | $18.79 \pm 2.18^a$   |
| D5       | 3-Methyl-2-cyclopenten-1-one         | 2758-18-1  | -                   | $30.8 \pm 4.12^a$    |
| D6       | Methyl cyclopentenolone              | 80-71-7    | $107.64 \pm 2.51^b$ | $121.17 \pm 15.21^a$ |
| Esters   |                                      |            |                     |                      |
| E1       | Ethyl 2-methylbutyrate               | 7452-79-1  | $3.32 \pm 0.46^a$   | -                    |
| E2       | Ethyl isovalerate                    | 108-64-5   | $17.95 \pm 0.61^a$  | $6.28 \pm 0.61^b$    |
| Acids    |                                      |            |                     |                      |
| F1       | 2-Methyl butyric acid                | 116-53-0   | $43.54 \pm 4.12^b$  | $68.09 \pm 6.12^a$   |
| F2       | Octanoic acid                        | 124-07-2   | $14.61 \pm 1.83^a$  | -                    |
| Alcohols |                                      |            |                     |                      |
| G1       | 1-Octene-3-ol                        | 3391-86-4  | -                   | $9.82 \pm 1.20^a$    |
| Ethers   |                                      |            |                     |                      |
| H1       | 1,2-Dimethoxybenzene                 | 91-16-7    | $28.6 \pm 2.33^b$   | $63.94 \pm 7.21^a$   |
| Others   |                                      |            |                     |                      |
| I1       | 3,4-Dimethoxytoluene                 | 494-99-5   | $18.03 \pm 1.59^b$  | $120.82 \pm 10.25^a$ |
| I2       | 1,2,3-Trimethoxybenzene              | 634-36-6   | $9.15 \pm 1.25^b$   | $13.92 \pm 1.49^a$   |
| I3       | 1,2-Dimethoxy-4-ethylbenzene         | 30405-75-5 | $8.84 \pm 1.03^b$   | $35.6 \pm 4.28^a$    |

Different superscript letters in the same row indicate significant differences ( $p < 0.05$ ), CAS: Chemical Abstract

Services registry number.
